# Supplementary material
Source: PubMed Central journal article supplement (PMC9125794)
Supplement: j_lingvan-2019-0063_suppl_002.pdf [file j_lingvan-2019-0063_suppl_002.pdf]

# Supplementary material to “*The extent and degree of utterance-final word lengthening in spontaneous speech from ten languages*”

Frank Seifart, Jan Strunk, Swintha Danielsen, Iren Hartmann, Brigitte Pakendorf,  
Søren Wichmann, Alena Witzlack-Makarevich, Nikolaus P. Himmelmann & Balthasar Bickel

## APPENDIX A: DATA PREPARATION

TABLE A1. Data selection and final data sets per language.

| language                          | initial data set |               | utterances > 4 words only |               | last 4 words only |               | no disfluencies |               | no pauses before words |               | pause after final word |               |
|-----------------------------------|------------------|---------------|---------------------------|---------------|-------------------|---------------|-----------------|---------------|------------------------|---------------|------------------------|---------------|
|                                   | words            | utterances    | words                     | utterances    | words             | utterances    | words           | utterances    | words                  | utterances    | words                  | utterances    |
| Baure                             | 17 563           | 4 331         | 10 915                    | 1 463         | 5 832             | 1 463         | 5 432           | 1 358         | 3 508                  | 877           | 2 992                  | 748           |
| Bora                              | 29 795           | 3 979         | 26 089                    | 2 642         | 10 565            | 2 642         | 9 592           | 2 398         | 8 200                  | 2 050         | 7 080                  | 1 770         |
| Chintang                          | 37 731           | 9 026         | 23 825                    | 3 420         | 13 677            | 3 420         | 12 504          | 3 126         | 7 280                  | 1 820         | 5 096                  | 1 274         |
| Dutch                             | 39 448           | 5 746         | 34 523                    | 3 012         | 11 974            | 3 012         | 11 500          | 2 875         | 11 032                 | 2 758         | 8 128                  | 2 032         |
| English                           | 56 136           | 6 941         | 51 121                    | 3 955         | 15 819            | 3 955         | 15 816          | 3 954         | 15 816                 | 3 954         | 8 544                  | 2 136         |
| Even                              | 37 394           | 4 839         | 33 345                    | 3 282         | 13 082            | 3 282         | 12 948          | 3 237         | 12 948                 | 3 237         | 12 116                 | 3 029         |
| Hoocak                            | 23 176           | 2 936         | 20 717                    | 2 024         | 8 093             | 2 024         | 8 088           | 2 022         | 8 088                  | 2 022         | 7 440                  | 1 860         |
| Njng                              | 25 850           | 7 775         | 11 121                    | 1 874         | 7 327             | 1 874         | 6 828           | 1 707         | 6 828                  | 1 707         | 5 112                  | 1 278         |
| Sakha                             | 31 139           | 3 925         | 27 832                    | 2 498         | 9 943             | 2 498         | 9 800           | 2 450         | 9 800                  | 2 450         | 8 560                  | 2 140         |
| Texistepec                        | 19 489           | 5 453         | 8 446                     | 1 336         | 5 344             | 1 336         | 5 344           | 1 336         | 5 344                  | 1 336         | 4 044                  | 1 011         |
| Texistepec (with final quotative) | 21 315           | 5 461         | 10 577                    | 1 672         | 6 687             | 1 672         | 6 684           | 1 671         | 6 684                  | 1 671         | 4 980                  | 1 245         |
| <b>total</b>                      | <b>319 547</b>   | <b>54 959</b> | <b>247 934</b>            | <b>25 506</b> | <b>101 656</b>    | <b>25 506</b> | <b>97 852</b>   | <b>24 463</b> | <b>88 844</b>          | <b>22 211</b> | <b>69 112</b>          | <b>17 278</b> |

Note that final quotatives in Texistepec are included in the **total** counts for the initial data set used to count word frequencies, but are excluded from the **total** counts for the final data set used to analyze word durations and final lengthening and the **total** counts for the intermediate steps. Pauses are defined as periods of silence of at least 0.2 seconds. Disfluencies include filled pauses, false starts, and disfluent or unintelligible words.

## APPENDIX B: BIVARIATE CORRELATIONS BETWEEN WORD POSITION AND WORD DURATION

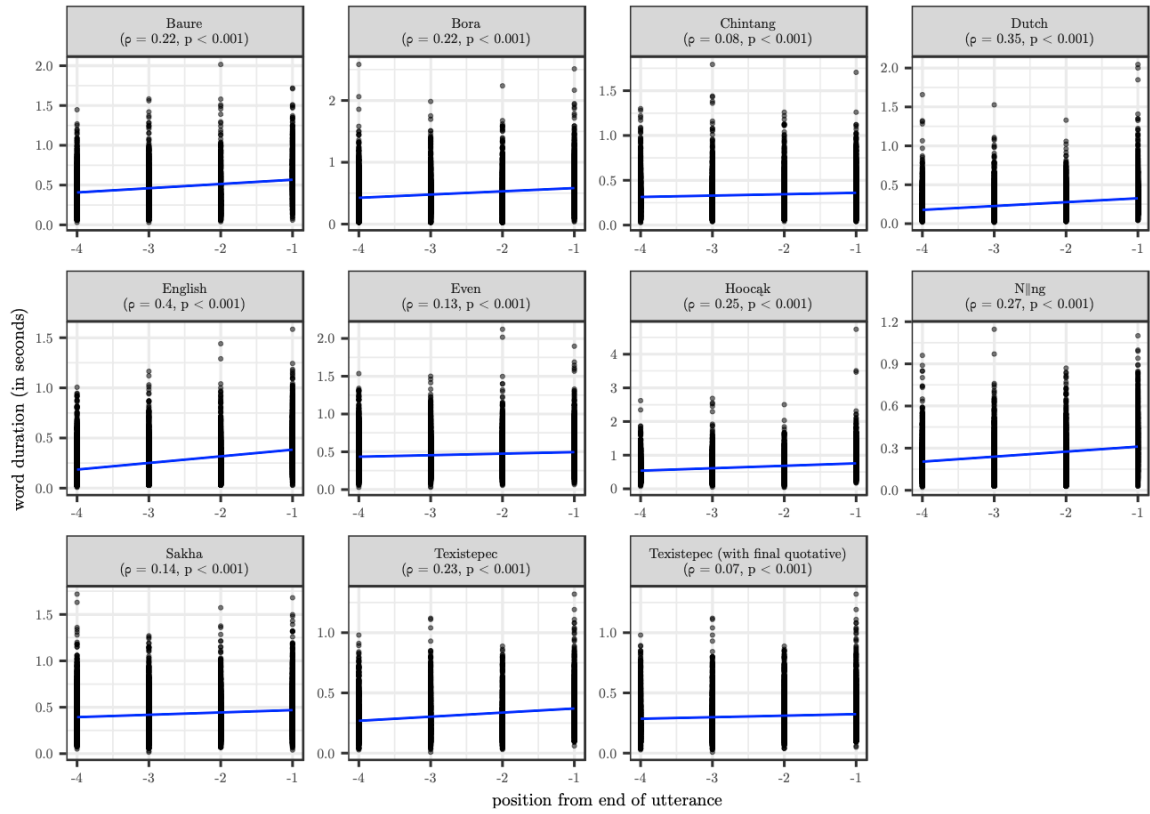

FIG B1. Simple bivariate linear regression of word position (counted from the end of the utterance) and word duration (strength of correlation is indicated using Spearman's rank-based correlation coefficient  $\rho$ )

## APPENDIX C: DETAILS ON THE INDIVIDUAL MIXED-EFFECTS MODELS FOR THE TEN LANGUAGES

### A. Baure

TABLE C1. Summary of fixed effects of the linear mixed-effects model of word duration in Baure

|                             | Coefficient | Std. Error | <i>df</i> | <i>t</i> | <i>p</i> | $\beta$ | $\Delta R^2_{(m)}\%$ | $\Delta R^2_{(c)}\%$ | $\chi^2$ | <i>df</i> | <i>p</i> |        |      |
|-----------------------------|-------------|------------|-----------|----------|----------|---------|----------------------|----------------------|----------|-----------|----------|--------|------|
| (Intercept)                 | -1.2987     | 0.0794     | 1356.7511 | -16.3607 | 0.0000   | ***     |                      |                      |          |           |          |        |      |
| position                    |             |            |           |          |          |         | 1.0651               | 0.4184               | 41.7136  | 3         | 0.0000   | ***    |      |
| position = -3 vs. -4        | -0.0102     | 0.0180     | 2942.0118 | -0.5670  | 0.5708   | n.s.    | -0.0067              |                      |          |           |          |        |      |
| position = -2 vs. -3 and -4 | 0.0155      | 0.0180     | 2927.7732 | 0.8607   | 0.3895   | n.s.    | 0.0102               |                      |          |           |          |        |      |
| position = -1 vs. -3 and -4 | 0.1038      | 0.0192     | 2966.8341 | 5.4101   | 0.0000   | ***     | 0.0685               |                      |          |           |          |        |      |
| log word frequency          | -0.0612     | 0.0064     | 610.2102  | -9.5745  | 0.0000   | ***     | -0.2253              | 9.9865               | 5.5095   | 82.2205   | 1        | 0.0000 | ***  |
| word length                 | 0.1056      | 0.0042     | 2010.9999 | 24.9730  | 0.0000   | ***     | 0.5142               | 15.9529              | 6.7354   | 539.5877  | 1        | 0.0000 | ***  |
| number of morphemes         | -0.0133     | 0.0113     | 2065.5773 | -1.1774  | 0.2392   | n.s.    | -0.0249              | 0.1153               | 0.0620   | 1.3979    | 1        | 0.2371 | n.s. |
| word class                  |             |            |           |          |          |         | 2.6337               | 1.4208               | 39.4540  | 2         | 0.0000   | ***    |      |
| word class = verb           | -0.0881     | 0.0242     | 2068.2612 | -3.6485  | 0.0003   | ***     | -0.0612              |                      |          |           |          |        |      |
| word class = other          | -0.1571     | 0.0254     | 1348.8918 | -6.1945  | 0.0000   | ***     | -0.1197              |                      |          |           |          |        |      |
| log speech rate             | -0.2106     | 0.0250     | 716.0425  | -8.4278  | 0.0000   | ***     | -0.0836              | 0.9716               | 0.5954   | 68.2531   | 1        | 0.0000 | ***  |

$n = 2\,992$ ,  $R^2_{(m)} = 0.6538$ ,  $R^2_{(c)} = 0.6959$

TABLE C2. Summary of random effects of the linear mixed-effects model of word duration in Baure

| Random effect | Groups | Std. Dev. | $\Delta R^2_{(m)}\%$ | $\Delta R^2_{(c)}\%$ | $\chi^2$ | <i>df</i> | <i>p</i> |      |
|---------------|--------|-----------|----------------------|----------------------|----------|-----------|----------|------|
| speaker       | 9      | 0.0000    | 0.0000               | 0.0000               | 0.0000   | 1         | 1.0000   | n.s. |
| text          | 34     | 0.0083    | 0.0087               | 0.0346               | 0.0169   | 1         | 0.8965   | n.s. |
| word type     | 1230   | 0.1237    | -2.8974              | 3.2201               | 438.3853 | 1         | 0.0000   | ***  |
| Residual      |        | 0.3337    |                      |                      |          |           |          |      |

## B. Bora

TABLE C3. Summary of fixed effects of the linear mixed-effects model of word duration in Bora

|                             | Coefficient | Std. Error | df        | t        | p      | $\beta$ | $\Delta R_{(m)}^2$ % | $\Delta R_{(c)}^2$ % | $\chi^2$ | df        | p             |
|-----------------------------|-------------|------------|-----------|----------|--------|---------|----------------------|----------------------|----------|-----------|---------------|
| (Intercept)                 | -1.5712     | 0.0569     | 456.4381  | -27.6157 | 0.0000 | ***     |                      |                      |          |           |               |
| position                    |             |            |           |          |        |         | 1.0877               | 0.4378               | 88.8427  | 3         | 0.0000 ***    |
| position = -3 vs. -4        | -0.0069     | 0.0111     | 6868.9477 | -0.6194  | 0.5357 | n.s.    | -0.0044              |                      |          |           |               |
| position = -2 vs. -3 and -4 | -0.0032     | 0.0112     | 6910.3507 | -0.2832  | 0.7771 | n.s.    | -0.0020              |                      |          |           |               |
| position = -1 vs. -3 and -4 | 0.0918      | 0.0119     | 7019.4540 | 7.6939   | 0.0000 | ***     | 0.0587               |                      |          |           |               |
| log word frequency          | -0.0704     | 0.0044     | 1714.0631 | -15.8578 | 0.0000 | ***     | -0.2364              | 15.7619              | 7.2399   | 232.2437  | 1 0.0000 ***  |
| word length                 | 0.0846      | 0.0024     | 5151.5459 | 35.2056  | 0.0000 | ***     | 0.4439               | 12.5356              | 4.1872   | 1100.6136 | 1 0.0000 ***  |
| number of morphemes         | -0.0001     | 0.0071     | 4768.2554 | -0.0166  | 0.9868 | n.s.    | -0.0002              | -0.0044              | 0.0000   | 0.0002    | 1 0.9879 n.s. |
| word class                  |             |            |           |          |        |         | 1.0606               | 0.4948               | 46.6263  | 2         | 0.0000 ***    |
| word class = verb           | -0.0273     | 0.0127     | 4840.6655 | -2.1423  | 0.0322 | *       | -0.0191              |                      |          |           |               |
| word class = other          | -0.0945     | 0.0141     | 4125.5458 | -6.7195  | 0.0000 | ***     | -0.0691              |                      |          |           |               |
| log speech rate             | -0.1798     | 0.0124     | 6856.8953 | -14.5492 | 0.0000 | ***     | -0.0944              | 4.2148               | 0.0307   | 207.1489  | 1 0.0000 ***  |

n = 7 080,  $R_{(m)}^2 = 0.6139$ ,  $R_{(c)}^2 = 0.7254$

TABLE C4. Summary of random effects of the linear mixed-effects model of word duration in Bora

| Random effect | Groups | Std. Dev. | $\Delta R_{(m)}^2$ % | $\Delta R_{(c)}^2$ % | $\chi^2$  | df  | p   |
|---------------|--------|-----------|----------------------|----------------------|-----------|-----|-----|
| speaker       | 32     | 0.1207    | -2.2845              | 1.1019               | 58.8369   | 1 0 | *** |
| text          | 37     | 0.0562    | 0.4315               | 0.3636               | 44.4736   | 1 0 | *** |
| word type     | 3583   | 0.1462    | -2.8609              | 7.1122               | 2139.6121 | 1 0 | *** |
| Residual      |        | 0.3104    |                      |                      |           |     |     |

### C. Chintang

TABLE C5. Summary of fixed effects of the linear mixed-effects model of word duration in Chintang

|                             | Coefficient | Std. Error | df       | t        | p      | $\beta$ | $\Delta R_{(m)}^2\%$ | $\Delta R_{(c)}^2\%$ | $\chi^2$ | df       | p             |
|-----------------------------|-------------|------------|----------|----------|--------|---------|----------------------|----------------------|----------|----------|---------------|
| (Intercept)                 | -1.2131     | 0.0670     | 2039.729 | -18.1190 | 0.0000 | ***     |                      |                      |          |          |               |
| position                    |             |            |          |          |        |         | 1.7783               | 1.3009               | 102.4517 | 3        | 0.0000 ***    |
| position = -3 vs. -4        | -0.0212     | 0.0156     | 5006.979 | -1.3584  | 0.1744 | n.s.    | -0.0149              |                      |          |          |               |
| position = -2 vs. -3 and -4 | -0.0121     | 0.0158     | 5016.543 | -0.7647  | 0.4445 | n.s.    | -0.0085              |                      |          |          |               |
| position = -1 vs. -3 and -4 | 0.1255      | 0.0165     | 5004.965 | 7.5848   | 0.0000 | ***     | 0.0880               |                      |          |          |               |
| log word frequency          | -0.0302     | 0.0052     | 1256.842 | -5.8293  | 0.0000 | ***     | -0.1182              | 6.3431               | 3.8757   | 33.3026  | 1 0.0000 ***  |
| word length                 | 0.1212      | 0.0044     | 3221.173 | 27.6302  | 0.0000 | ***     | 0.5163               | 21.8055              | 9.3072   | 670.0373 | 1 0.0000 ***  |
| number of morphemes         | -0.0063     | 0.0093     | 3517.655 | -0.6766  | 0.4987 | n.s.    | -0.0134              | 0.1768               | 0.1074   | 0.4609   | 1 0.4972 n.s. |
| word class                  |             |            |          |          |        |         | 1.4909               | 0.6223               | 44.5539  | 2        | 0.0000 ***    |
| word class = verb           | -0.0963     | 0.0231     | 3548.586 | -4.1740  | 0.0000 | ***     | -0.0695              |                      |          |          |               |
| word class = other          | -0.1342     | 0.0203     | 3047.005 | -6.6018  | 0.0000 | ***     | -0.1078              |                      |          |          |               |
| log speech rate             | -0.2913     | 0.0174     | 3252.990 | -16.7374 | 0.0000 | ***     | -0.1747              | 11.5917              | 1.0810   | 254.6365 | 1 0.0000 ***  |

n = 5 096,  $R_{(m)}^2 = 0.4961$ ,  $R_{(c)}^2 = 0.5639$

TABLE C6. Summary of random effects of the linear mixed-effects model of word duration in Chintang

| Random effect | Groups | Std. Dev. | $\Delta R_{(m)}^2\%$ | $\Delta R_{(c)}^2\%$ | $\chi^2$ | df | p           |
|---------------|--------|-----------|----------------------|----------------------|----------|----|-------------|
| speaker       | 51     | 0.0788    | -0.7284              | 0.0885               | 22.9817  | 1  | 0.0000 ***  |
| text          | 40     | 0.0366    | -0.0737              | 0.1307               | 1.6755   | 1  | 0.1955 n.s. |
| word type     | 2183   | 0.1225    | -8.8972              | 0.5191               | 332.6740 | 1  | 0.0000 ***  |
| Residual      |        | 0.3810    |                      |                      |          |    |             |

## D. Dutch

TABLE C7. Summary of fixed effects of the linear mixed-effects model of word duration in Dutch

|                             | Coefficient | Std. Error | <i>df</i> | <i>t</i> | <i>p</i> | $\beta$ | $\Delta R_{(m)}^2\%$ | $\Delta R_{(c)}^2\%$ | $\chi^2$ | <i>df</i> | <i>p</i> |
|-----------------------------|-------------|------------|-----------|----------|----------|---------|----------------------|----------------------|----------|-----------|----------|
| (Intercept)                 | -1.8632     | 0.0595     | 1405.447  | -31.3260 | 0.0000   | ***     |                      |                      |          |           |          |
| position                    |             |            |           |          |          |         | 6.1786               | 3.0566               | 722.6177 | 3         | 0 ***    |
| position = -3 vs. -4        | 0.0125      | 0.0113     | 7874.313  | 1.1045   | 0.2694   | n.s.    | 0.0083               |                      |          |           |          |
| position = -2 vs. -3 and -4 | 0.0649      | 0.0115     | 7990.281  | 5.6291   | 0.0000   | ***     | 0.0430               |                      |          |           |          |
| position = -1 vs. -3 and -4 | 0.3078      | 0.0124     | 8056.223  | 24.8574  | 0.0000   | ***     | 0.2039               |                      |          |           |          |
| log word frequency          | -0.0792     | 0.0047     | 1446.498  | -16.9208 | 0.0000   | ***     | -0.2675              | 14.9216              | 7.4129   | 265.5039  | 1 0 ***  |
| word length                 | 0.1079      | 0.0027     | 3818.183  | 39.9498  | 0.0000   | ***     | 0.4305               | 14.6817              | -2.3878  | 1244.6068 | 1 0 ***  |
| word class                  |             |            |           |          |          |         | 0.3969               | -0.0109              | 45.8560  | 2         | 0 ***    |
| word class = verb           | -0.0987     | 0.0184     | 3119.451  | -5.3699  | 0.0000   | ***     | -0.0600              |                      |          |           |          |
| word class = other          | -0.1114     | 0.0174     | 3120.461  | -6.4168  | 0.0000   | ***     | -0.0808              |                      |          |           |          |
| log speech rate             | -0.2586     | 0.0140     | 8008.947  | -18.4475 | 0.0000   | ***     | -0.1231              | 3.7452               | 1.0639   | 329.9517  | 1 0 ***  |

n = 8 128,  $R_{(m)}^2 = 0.6077$ ,  $R_{(c)}^2 = 0.693$

TABLE C8. Summary of random effects of the linear mixed-effects model of word duration in Dutch

| Random effect | Groups | Std. Dev. | $\Delta R_{(m)}^2\%$ | $\Delta R_{(c)}^2\%$ | $\chi^2$  | <i>df</i> | <i>p</i>    |
|---------------|--------|-----------|----------------------|----------------------|-----------|-----------|-------------|
| speaker       | 42     | 0.0800    | -0.3629              | 0.9012               | 100.9930  | 1         | 0.0000 ***  |
| text          | 17     | 0.0468    | -0.0090              | 0.0069               | 1.9074    | 1         | 0.1673 n.s. |
| word type     | 2023   | 0.1576    | -0.7515              | 8.8451               | 1295.3045 | 1         | 0.0000 ***  |
| Residual      |        | 0.3467    |                      |                      |           |           |             |

## E. English

TABLE C9. Summary of fixed effects of the linear mixed-effects model of word duration in English

|                             | Coefficient | Std. Error | <i>df</i> | <i>t</i> | <i>p</i> | $\beta$ | $\Delta R_{(m)}^2\%$ | $\Delta R_{(c)}^2\%$ | $\chi^2$  | <i>df</i> | <i>p</i>      |
|-----------------------------|-------------|------------|-----------|----------|----------|---------|----------------------|----------------------|-----------|-----------|---------------|
| (Intercept)                 | -1.9348     | 0.0586     | 2978.479  | -33.0163 | 0.0000   | ***     |                      |                      |           |           |               |
| position                    |             |            |           |          |          |         | 16.6583              | 10.2847              | 1762.3388 | 3         | 0.0000 ***    |
| position = -3 vs. -4        | -0.0038     | 0.0109     | 8267.386  | -0.3511  | 0.7255   | n.s.    | -0.0023              |                      |           |           |               |
| position = -2 vs. -3 and -4 | 0.0496      | 0.0110     | 8301.226  | 4.5209   | 0.0000   | ***     | 0.0297               |                      |           |           |               |
| position = -1 vs. -3 and -4 | 0.4603      | 0.0119     | 8451.635  | 38.5593  | 0.0000   | ***     | 0.2754               |                      |           |           |               |
| log word frequency          | -0.0797     | 0.0051     | 1671.062  | -15.6178 | 0.0000   | ***     | -0.2499              | 14.9972              | 6.2270    | 223.4119  | 1 0.0000 ***  |
| word length                 | 0.1056      | 0.0039     | 3026.562  | 27.4205  | 0.0000   | ***     | 0.3192               | 15.9647              | 2.9981    | 649.5153  | 1 0.0000 ***  |
| number of morphemes         | 0.0079      | 0.0168     | 3398.906  | 0.4699   | 0.6385   | n.s.    | 0.0039               | -0.0918              | -0.0450   | 0.2196    | 1 0.6393 n.s. |
| word class                  |             |            |           |          |          |         | 0.6704               | 0.1583               | 20.7199   | 2         | 0.0000 ***    |
| word class = verb           | -0.0762     | 0.0200     | 2699.745  | -3.7995  | 0.0001   | ***     | -0.0412              |                      |           |           |               |
| word class = other          | -0.0715     | 0.0187     | 2268.382  | -3.8179  | 0.0001   | ***     | -0.0485              |                      |           |           |               |
| log speech rate             | -0.1961     | 0.0134     | 8119.820  | -14.6318 | 0.0000   | ***     | -0.0863              | 2.0055               | 0.4778    | 208.0474  | 1 0.0000 ***  |

n = 8 544,  $R_{(m)}^2 = 0.5964$ ,  $R_{(c)}^2 = 0.7028$

TABLE C10. Summary of random effects of the linear mixed-effects model of word duration in English

| Random effect | Groups | Std. Dev. | $\Delta R_{(m)}^2\%$ | $\Delta R_{(c)}^2\%$ | $\chi^2$  | <i>df</i> | <i>p</i>    |
|---------------|--------|-----------|----------------------|----------------------|-----------|-----------|-------------|
| speaker       | 80     | 0.0829    | 0.0282               | 0.5557               | 102.4100  | 1         | 0.0000 ***  |
| text          | 47     | 0.0321    | 0.0225               | 0.0155               | 1.8112    | 1         | 0.1784 n.s. |
| word type     | 1771   | 0.1838    | -7.8735              | 6.3458               | 2671.3349 | 1         | 0.0000 ***  |
| Residual      |        | 0.3412    |                      |                      |           |           |             |

## F. Even

TABLE C11. Summary of fixed effects of the linear mixed-effects model of word duration in Even

|                             | Coefficient | Std. Error | <i>df</i>  | <i>t</i> | <i>p</i> | $\beta$ | $\Delta R^2_{(m)}\%$ | $\Delta R^2_{(c)}\%$ | $\chi^2$ | <i>df</i> | <i>p</i>   |            |
|-----------------------------|-------------|------------|------------|----------|----------|---------|----------------------|----------------------|----------|-----------|------------|------------|
| (Intercept)                 | -1.3240     | 0.0335     | 321.0463   | -39.5032 | 0.0000   | ***     |                      |                      |          |           |            |            |
| position                    |             |            |            |          |          |         | 0.8754               | 0.9623               | 232.6190 | 3         | 0.0000 *** |            |
| position = -3 vs. -4        | -0.0302     | 0.0069     | 11953.1951 | -4.3670  | 0.0000   | ***     | -0.0292              |                      |          |           |            |            |
| position = -2 vs. -3 and -4 | -0.0506     | 0.0070     | 11998.0801 | -7.2852  | 0.0000   | ***     | -0.0490              |                      |          |           |            |            |
| position = -1 vs. -3 and -4 | 0.0528      | 0.0073     | 12021.8267 | 7.2418   | 0.0000   | ***     | 0.0511               |                      |          |           |            |            |
| log word frequency          | -0.0346     | 0.0024     | 1385.0853  | -14.4847 | 0.0000   | ***     | -0.1797              | 7.1683               | 4.4474   | 198.4946  | 1          | 0.0000 *** |
| word length                 | 0.1016      | 0.0015     | 6805.4718  | 69.4402  | 0.0000   | ***     | 0.6285               | 21.8624              | 2.8681   | 3569.8142 | 1          | 0.0000 *** |
| number of morphemes         | -0.0097     | 0.0037     | 6357.9725  | -2.5879  | 0.0097   | **      | -0.0237              | 0.0302               | 0.0877   | 6.6840    | 1          | 0.0097 **  |
| word class                  |             |            |            |          |          |         | 0.8307               | 0.2219               |          | 68.3997   | 2          | 0.0000 *** |
| word class = verb           | -0.0284     | 0.0082     | 6295.0639  | -3.4767  | 0.0005   | ***     | -0.0306              |                      |          |           |            |            |
| word class = other          | -0.0711     | 0.0086     | 3823.5436  | -8.2928  | 0.0000   | ***     | -0.0774              |                      |          |           |            |            |
| log speech rate             | -0.1796     | 0.0085     | 11657.4109 | -21.1621 | 0.0000   | ***     | -0.1293              | 4.7939               | -0.1719  | 433.5653  | 1          | 0.0000 *** |

n = 12 116,  $R^2_{(m)} = 0.6076$ ,  $R^2_{(c)} = 0.6727$

TABLE C12. Summary of random effects of the linear mixed-effects model of word duration in Even

| Random effect | Groups | Std. Dev. | $\Delta R^2_{(m)}\%$ | $\Delta R^2_{(c)}\%$ | $\chi^2$ | <i>df</i> | <i>p</i> |
|---------------|--------|-----------|----------------------|----------------------|----------|-----------|----------|
| speaker       | 31     | 0.0818    | -1.7780              | 0.9407               | 79.2517  | 1         | 0 ***    |
| text          | 67     | 0.0414    | -0.3054              | 0.1255               | 81.4343  | 1         | 0 ***    |
| word type     | 5066   | 0.0725    | 4.5852               | 7.4761               | 601.4323 | 1         | 0 ***    |
| Residual      |        | 0.2620    |                      |                      |          |           |          |



## G. Hoocak

TABLE C13. Summary of fixed effects of the linear mixed-effects model of word duration in Hoocak

|                             | Coefficient | Std. Error | <i>df</i> | <i>t</i> | <i>p</i> | $\beta$ | $\Delta R_{(m)}^2\%$ | $\Delta R_{(c)}^2\%$ | $\chi^2$ | <i>df</i> | <i>p</i>      |
|-----------------------------|-------------|------------|-----------|----------|----------|---------|----------------------|----------------------|----------|-----------|---------------|
| (Intercept)                 | -1.0859     | 0.0459     | 484.9721  | -23.6331 | 0.0000   | ***     |                      |                      |          |           |               |
| position                    |             |            |           |          |          |         | 3.9859               | 2.8045               | 460.2348 | 3         | 0.0000 ***    |
| position = -3 vs. -4        | -0.0269     | 0.0094     | 7248.2745 | -2.8544  | 0.0043   | **      | -0.0227              |                      |          |           |               |
| position = -2 vs. -3 and -4 | -0.0531     | 0.0096     | 7305.6901 | -5.5587  | 0.0000   | ***     | -0.0447              |                      |          |           |               |
| position = -1 vs. -3 and -4 | 0.1540      | 0.0102     | 7336.8463 | 15.0337  | 0.0000   | ***     | 0.1295               |                      |          |           |               |
| log word frequency          | -0.0435     | 0.0036     | 1012.3973 | -11.9555 | 0.0000   | ***     | -0.2055              | 9.4706               | 5.3130   | 137.2298  | 1 0.0000 ***  |
| word length                 | 0.0882      | 0.0019     | 4430.6666 | 46.3132  | 0.0000   | ***     | 0.5790               | 14.9523              | -0.6192  | 1661.4636 | 1 0.0000 ***  |
| number of morphemes         | 0.0051      | 0.0055     | 5001.7438 | 0.9188   | 0.3582   | n.s.    | 0.0111               | -0.0475              | -0.0172  | 0.8416    | 1 0.3589 n.s. |
| word class                  |             |            |           |          |          |         | 0.3640               | 0.3067               | 6.8583   | 2         | 0.0324 *      |
| word class = verb           | -0.0234     | 0.0130     | 3758.7076 | -1.7982  | 0.0722   | n.s.    | -0.0222              |                      |          |           |               |
| word class = other          | -0.0358     | 0.0137     | 3030.5009 | -2.6236  | 0.0087   | **      | -0.0348              |                      |          |           |               |
| log speech rate             | -0.2117     | 0.0125     | 7023.7954 | -16.9910 | 0.0000   | ***     | -0.1371              | 4.6366               | 0.1997   | 279.6293  | 1 0.0000 ***  |

n = 7 440,  $R_{(m)}^2 = 0.6349$ ,  $R_{(c)}^2 = 0.7176$

TABLE C14. Summary of random effects of the linear mixed-effects model of word duration in Hoocak

| Random effect | Groups | Std. Dev. | $\Delta R_{(m)}^2\%$ | $\Delta R_{(c)}^2\%$ | $\chi^2$ | <i>df</i> | <i>p</i> |
|---------------|--------|-----------|----------------------|----------------------|----------|-----------|----------|
| speaker       | 26     | 0.0839    | -1.3326              | 0.6466               | 48.7970  | 1 0       | ***      |
| text          | 62     | 0.0661    | 0.1754               | 1.0367               | 119.2469 | 1 0       | ***      |
| word type     | 3486   | 0.1045    | 1.1456               | 6.6489               | 363.7656 | 1 0       | ***      |
| Residual      |        | 0.2762    |                      |                      |          |           |          |

## H. N||ng

TABLE C15. Summary of fixed effects of the linear mixed-effects model of word duration in N||ng

|                                                       | Coefficient | Std. Error | <i>df</i> | <i>t</i> | <i>p</i> |      | $\beta$ | $\Delta R^2_{(m)}\%$ | $\Delta R^2_{(c)}\%$ | $\chi^2$ | <i>df</i> | <i>p</i>   |
|-------------------------------------------------------|-------------|------------|-----------|----------|----------|------|---------|----------------------|----------------------|----------|-----------|------------|
| (Intercept)                                           | -1.8929     | 0.0732     | 101.3854  | -25.8733 | 0.0000   | ***  |         |                      |                      |          |           |            |
| position                                              |             |            |           |          |          |      |         | 2.0355               | 1.5080               | 125.0768 | 3         | 0.0000 *** |
| position = -3 vs. -4                                  | 0.0211      | 0.0150     | 5045.1842 | 1.4019   | 0.1610   | n.s. | 0.0153  |                      |                      |          |           |            |
| position = -2 vs. -3 and -4                           | 0.0341      | 0.0156     | 5051.3787 | 2.1805   | 0.0293   | *    | 0.0247  |                      |                      |          |           |            |
| position = -1 vs. -3 and -4                           | 0.1773      | 0.0170     | 4839.2542 | 10.4481  | 0.0000   | ***  | 0.1285  |                      |                      |          |           |            |
| log word frequency                                    | -0.0383     | 0.0054     | 811.2755  | -7.0942  | 0.0000   | ***  | -0.1237 | 6.4371               | 3.7960               | 49.0203  | 1         | 0.0000 *** |
| word length                                           | 0.1409      | 0.0057     | 1655.5013 | 24.6217  | 0.0000   | ***  | 0.4279  | 18.8282              | 3.5293               | 492.5764 | 1         | 0.0000 *** |
| number of morphemes                                   | 0.0751      | 0.0200     | 1971.8458 | 3.7533   | 0.0002   | ***  | 0.0450  | -0.2153              | -0.1613              | 14.0917  | 1         | 0.0002 *** |
| word class                                            |             |            |           |          |          |      |         | 5.1928               | 2.6496               | 56.7985  | 2         | 0.0000 *** |
| word class = verb                                     | -0.0167     | 0.0198     | 1388.5880 | -0.8431  | 0.3993   | n.s. | -0.0124 |                      |                      |          |           |            |
| word class = other                                    | -0.1592     | 0.0235     | 1131.9293 | -6.7863  | 0.0000   | ***  | -0.1331 |                      |                      |          |           |            |
| log speech rate                                       | -0.1616     | 0.0177     | 4959.9434 | -9.1395  | 0.0000   | ***  | -0.0973 | 3.3120               | -0.4580              | 81.8945  | 1         | 0.0000 *** |
| n = 5 112, $R^2_{(m)} = 0.5122$ , $R^2_{(c)} = 0.589$ |             |            |           |          |          |      |         |                      |                      |          |           |            |

TABLE C16. Summary of random effects of the linear mixed-effects model of word duration in N||ng

| Random effect | Groups | Std. Dev. | $\Delta R^2_{(m)}\%$ | $\Delta R^2_{(c)}\%$ | $\chi^2$ | <i>df</i> | <i>p</i> |
|---------------|--------|-----------|----------------------|----------------------|----------|-----------|----------|
| speaker       | 7      | 0.0878    | -0.1573              | 0.1360               | 27.0101  | 1         | 0 ***    |
| text          | 33     | 0.0712    | -0.6310              | 1.8600               | 86.7646  | 1         | 0 ***    |
| word type     | 1081   | 0.1117    | -4.5161              | 2.5231               | 266.4808 | 1         | 0 ***    |
| Residual      |        | 0.3676    |                      |                      |          |           |          |

## I. Sakha

TABLE C17. Summary of fixed effects of the linear mixed-effects model of word duration in Sakha

|                             | Coefficient | Std. Error | df        | t        | p      | $\beta$ | $\Delta R_{(m)}^2\%$ | $\Delta R_{(c)}^2\%$ | $\chi^2$ | df        | p      |        |     |
|-----------------------------|-------------|------------|-----------|----------|--------|---------|----------------------|----------------------|----------|-----------|--------|--------|-----|
| (Intercept)                 | -1.4626     | 0.0406     | 899.9154  | -36.0286 | 0.0000 | ***     |                      |                      |          |           |        |        |     |
| position                    |             |            |           |          |        |         | 2.7634               | 2.4609               | 448.9038 | 3         | 0.0000 | ***    |     |
| position = -3 vs. -4        | -0.0192     | 0.0084     | 8473.2931 | -2.2827  | 0.0225 | *       | -0.0166              |                      |          |           |        |        |     |
| position = -2 vs. -3 and -4 | -0.0344     | 0.0085     | 8519.5093 | -4.0217  | 0.0001 | ***     | -0.0298              |                      |          |           |        |        |     |
| position = -1 vs. -3 and -4 | 0.1361      | 0.0089     | 8530.1259 | 15.2605  | 0.0000 | ***     | 0.1178               |                      |          |           |        |        |     |
| log word frequency          | -0.0468     | 0.0031     | 1938.9360 | -14.8575 | 0.0000 | ***     | -0.1909              | 8.1241               | 4.6090   | 207.8726  | 1      | 0.0000 | *** |
| word length                 | 0.1031      | 0.0018     | 6025.9208 | 56.9056  | 0.0000 | ***     | 0.5846               | 24.5786              | 6.0018   | 2502.6348 | 1      | 0.0000 | *** |
| number of morphemes         | -0.0137     | 0.0061     | 5703.2966 | -2.2572  | 0.0240 | *       | -0.0235              | 0.0820               | 0.0305   | 5.1050    | 1      | 0.0239 | *   |
| word class                  |             |            |           |          |        |         |                      | 0.3199               | 0.1653   | 27.5334   | 2      | 0.0000 | *** |
| word class = verb           | -0.0285     | 0.0097     | 4857.8099 | -2.9401  | 0.0033 | **      | -0.0273              |                      |          |           |        |        |     |
| word class = other          | -0.0544     | 0.0107     | 3625.7221 | -5.1013  | 0.0000 | ***     | -0.0520              |                      |          |           |        |        |     |
| log speech rate             | -0.1846     | 0.0110     | 7608.2413 | -16.7640 | 0.0000 | ***     | -0.1142              | 2.7689               | 0.7877   | 273.1690  | 1      | 0.0000 | *** |

n = 8 560,  $R_{(m)}^2 = 0.6342$ ,  $R_{(c)}^2 = 0.6945$

TABLE C18. Summary of random effects of the linear mixed-effects model of word duration in Sakha

| Random effect | Groups | Std. Dev. | $\Delta R_{(m)}^2\%$ | $\Delta R_{(c)}^2\%$ | $\chi^2$ | df | p     |      |
|---------------|--------|-----------|----------------------|----------------------|----------|----|-------|------|
| speaker       | 22     | 0.0623    | 0.2813               | 0.0223               | 20.6866  | 1  | 0.000 | ***  |
| text          | 16     | 0.0052    | 0.0034               | -0.0017              | 0.0016   | 1  | 0.968 | n.s. |
| word type     | 3566   | 0.0987    | -0.8847              | 5.3986               | 957.0892 | 1  | 0.000 | ***  |
| Residual      |        | 0.2630    |                      |                      |          |    |       |      |

## J. Texistepec

TABLE C19. Summary of fixed effects of the linear mixed-effects model of word duration in Texistepec

|                             | Coefficient | Std. Error | <i>df</i> | <i>t</i> | <i>p</i> | $\beta$ | $\Delta R_{(m)}^2$ % | $\Delta R_{(c)}^2$ % | $\chi^2$ | <i>df</i> | <i>p</i> |        |     |
|-----------------------------|-------------|------------|-----------|----------|----------|---------|----------------------|----------------------|----------|-----------|----------|--------|-----|
| (Intercept)                 | -1.7548     | 0.0663     | 1195.7490 | -26.4577 | 0.0000   | ***     |                      |                      |          |           |          |        |     |
| position                    |             |            |           |          |          |         | 1.0307               | 0.4173               | 28.9585  | 3         | 0.0000   | ***    |     |
| position = -3 vs. -4        | 0.0095      | 0.0154     | 3929.3704 | 0.6171   | 0.5372   | n.s.    | 0.0073               |                      |          |           |          |        |     |
| position = -2 vs. -3 and -4 | 0.0156      | 0.0157     | 3961.2739 | 0.9925   | 0.3210   | n.s.    | 0.0119               |                      |          |           |          |        |     |
| position = -1 vs. -3 and -4 | 0.0849      | 0.0170     | 4009.2099 | 4.9819   | 0.0000   | ***     | 0.0648               |                      |          |           |          |        |     |
| log word frequency          | -0.0465     | 0.0065     | 909.9833  | -7.1103  | 0.0000   | ***     | -0.1764              | 9.2104               | 5.0615   | 49.4378   | 1        | 0.0000 | *** |
| word length                 | 0.1273      | 0.0046     | 1766.3941 | 27.9288  | 0.0000   | ***     | 0.5676               | 23.0361              | 0.2041   | 617.4210  | 1        | 0.0000 | *** |
| number of morphemes         | -0.0378     | 0.0126     | 1887.7431 | -3.0067  | 0.0027   | **      | -0.0652              | 1.0705               | 0.4969   | 9.0573    | 1        | 0.0026 | **  |
| word class                  |             |            |           |          |          |         | 2.4490               | 0.7516               | 36.7617  | 2         | 0.0000   | ***    |     |
| word class = verb           | -0.0960     | 0.0238     | 1739.9953 | -4.0280  | 0.0001   | ***     | -0.0780              |                      |          |           |          |        |     |
| word class = other          | -0.1415     | 0.0236     | 1279.9248 | -5.9845  | 0.0000   | ***     | -0.1246              |                      |          |           |          |        |     |
| log speech rate             | -0.1375     | 0.0149     | 4017.0746 | -9.2588  | 0.0000   | ***     | -0.0906              | 1.8398               | 0.7985   | 84.7741   | 1        | 0.0000 | *** |

n = 4 044,  $R_{(m)}^2 = 0.5493$ ,  $R_{(c)}^2 = 0.6376$

TABLE C20. Summary of random effects of the linear mixed-effects model of word duration in Texistepec

| Random effect | Groups | Std. Dev. | $\Delta R_{(m)}^2$ % | $\Delta R_{(c)}^2$ % | $\chi^2$ | <i>df</i> | <i>p</i> |     |
|---------------|--------|-----------|----------------------|----------------------|----------|-----------|----------|-----|
| text          | 6      | 0.0229    | 0.0888               | 0.1260               | 7.4626   | 1         | 0.0063   | **  |
| word type     | 1306   | 0.1604    | -4.4345              | 9.5268               | 425.1106 | 1         | 0.0000   | *** |
| Residual      |        | 0.3282    |                      |                      |          |           |          |     |

### K. Texistepec (with final quotative)

TABLE C21. Summary of fixed effects of the linear mixed-effects model of word duration in Texistepec (with final quotative)

|                             | Coefficient | Std. Error | <i>df</i> | <i>t</i> | <i>p</i> | $\beta$ | $\Delta R^2_{(m)}\%$ | $\Delta R^2_{(c)}\%$ | $\chi^2$ | <i>df</i> | <i>p</i> |        |     |
|-----------------------------|-------------|------------|-----------|----------|----------|---------|----------------------|----------------------|----------|-----------|----------|--------|-----|
| (Intercept)                 | -1.7377     | 0.0627     | 982.6341  | -27.7085 | 0.0000   | ***     |                      |                      |          |           |          |        |     |
| position                    |             |            |           |          |          |         | -0.4770              | -0.6344              | 8.8808   | 3         | 0.0309   | *      |     |
| position = -3 vs. -4        | -0.0068     | 0.0141     | 4911.2900 | -0.4774  | 0.6331   | n.s.    | -0.0052              |                      |          |           |          |        |     |
| position = -2 vs. -3 and -4 | 0.0102      | 0.0145     | 4961.6379 | 0.7008   | 0.4834   | n.s.    | 0.0078               |                      |          |           |          |        |     |
| position = -1 vs. -3 and -4 | 0.0392      | 0.0160     | 4967.7530 | 2.4520   | 0.0142   | *       | 0.0303               |                      |          |           |          |        |     |
| log word frequency          | -0.0497     | 0.0062     | 959.1470  | -7.9582  | 0.0000   | ***     | -0.2194              | 14.0214              | 8.0810   | 61.3300   | 1        | 0.0000 | *** |
| word length                 | 0.1245      | 0.0044     | 1916.7933 | 28.1846  | 0.0000   | ***     | 0.5390               | 20.9139              | -0.4549  | 635.8758  | 1        | 0.0000 | *** |
| number of morphemes         | -0.0391     | 0.0120     | 2054.5276 | -3.2586  | 0.0011   | **      | -0.0653              | 1.7933               | 0.9573   | 10.6196   | 1        | 0.0011 | **  |
| word class                  |             |            |           |          |          |         | 3.0190               | 1.0153               | 42.4380  | 2         | 0.0000   | ***    |     |
| word class = verb           | -0.0886     | 0.0229     | 1854.6040 | -3.8764  | 0.0001   | ***     | -0.0715              |                      |          |           |          |        |     |
| word class = other          | -0.1477     | 0.0226     | 1349.9460 | -6.5446  | 0.0000   | ***     | -0.1308              |                      |          |           |          |        |     |
| log speech rate             | -0.1384     | 0.0135     | 4958.1588 | -10.2400 | 0.0000   | ***     | -0.0918              | 2.1903               | 0.9718   | 103.8894  | 1        | 0.0000 | *** |

n = 4 980,  $R^2_{(m)} = 0.5374$ ,  $R^2_{(c)} = 0.623$

TABLE C22. Summary of random effects of the linear mixed-effects model of word duration in Texistepec (with final quotative)

| Random effect | Groups | Std. Dev. | $\Delta R^2_{(m)}\%$ | $\Delta R^2_{(c)}\%$ | $\chi^2$ | <i>df</i> | <i>p</i> |     |
|---------------|--------|-----------|----------------------|----------------------|----------|-----------|----------|-----|
| text          | 6      | 0.0274    | 0.0795               | 0.2471               | 12.3442  | 1         | 0.0004   | *** |
| word type     | 1423   | 0.1560    | -6.2366              | 7.8441               | 410.3069 | 1         | 0.0000   | *** |
| Residual      |        | 0.3323    |                      |                      |          |           |          |     |
